# Supplementary material
Source: PubMed Central journal article supplement (PMC3594127)

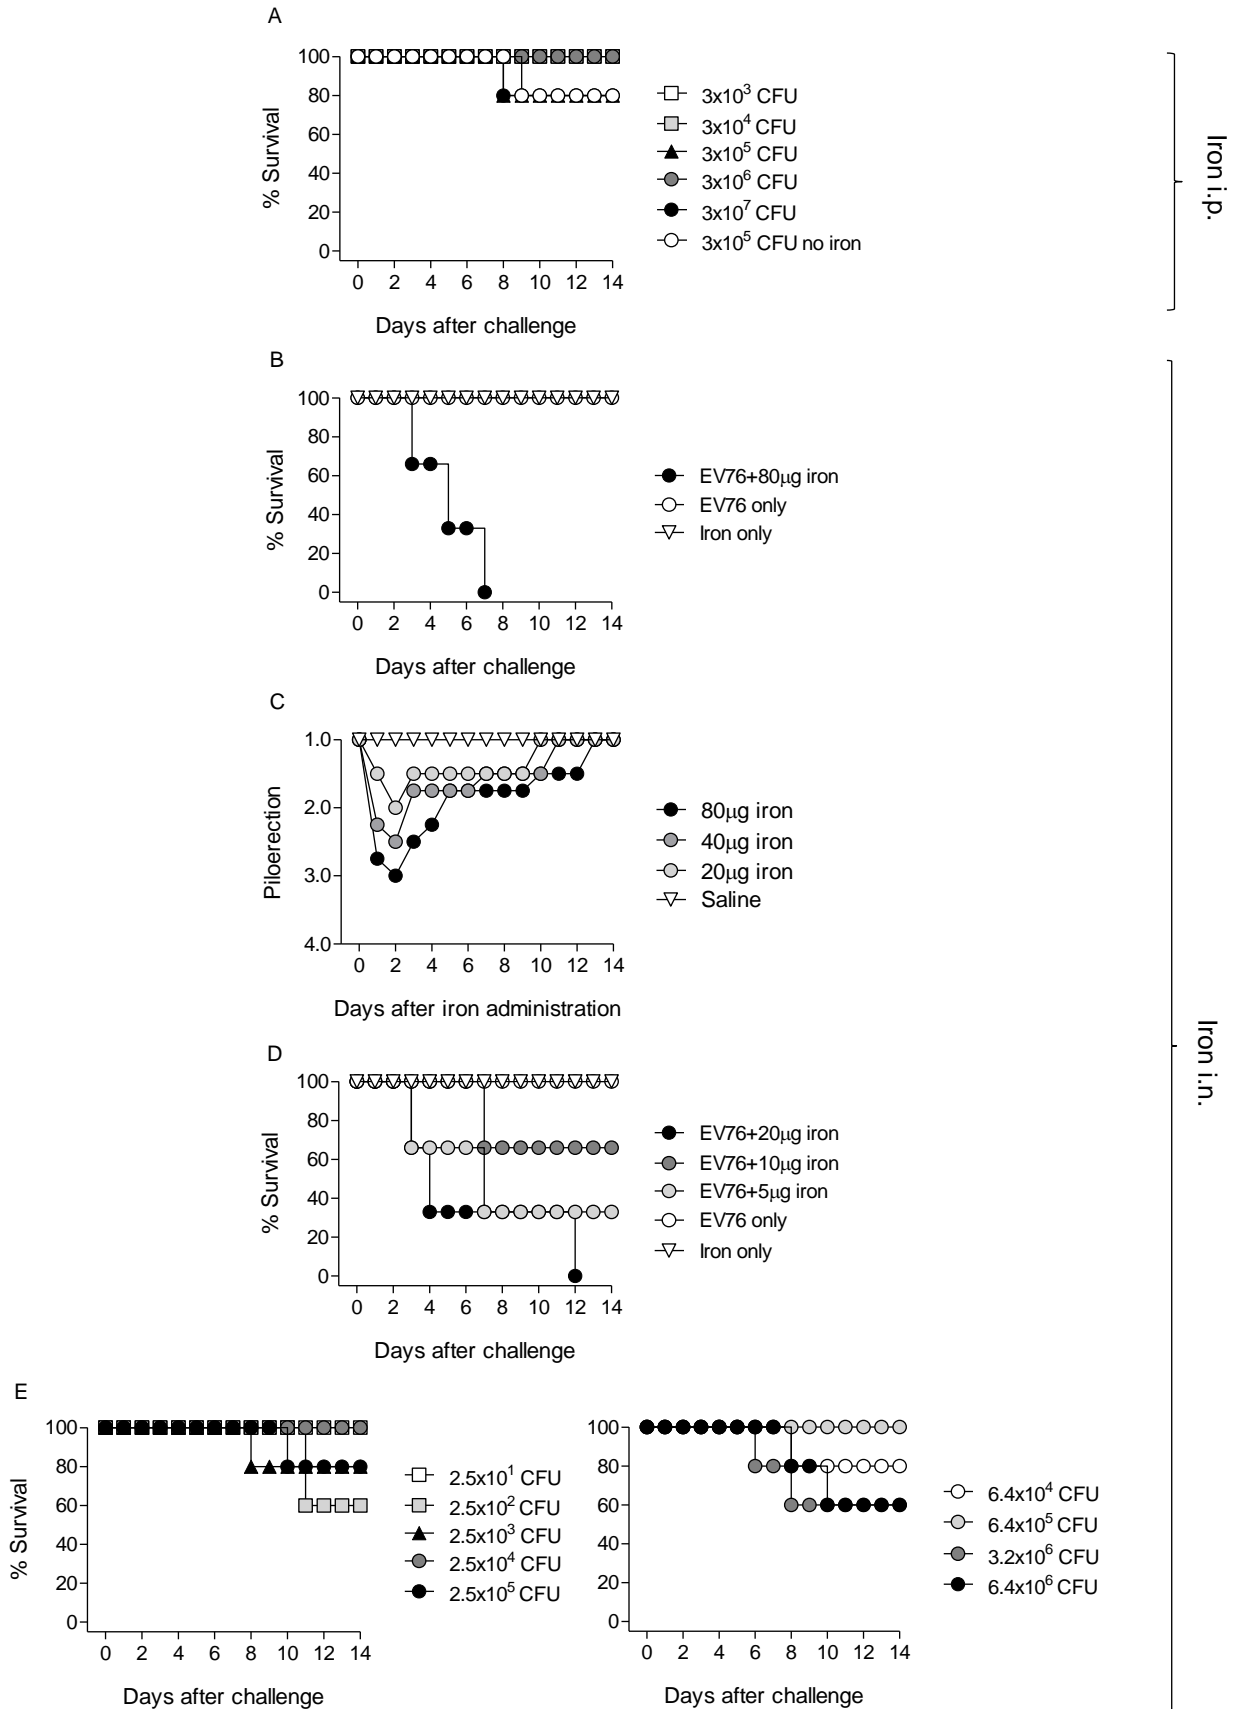

Supplement: NIHMS422151-supplement-01.pdf [file NIHMS422151-supplement-01.pdf]
